# Supplementary material
Source: Royal Society of Chemistry journal article supplement (doi:10.1039/d6ce00184j)
Supplement: d6ce00184j1.pdf [file d6ce00184j1.pdf]

**A novel naproxen potassium dihydrate: Single-crystal structure and solid-state characterization of the dihydrate and its anhydrous form with improved dissolution properties**

*Marina Antonio<sup>a,b,\*</sup>, Gustavo Terrestre<sup>b</sup>, Sebastián Barolin<sup>c</sup>, Rubén M. Maggio<sup>a,b,\*</sup>*

*<sup>a</sup> Área de Análisis de Medicamentos, Facultad de Ciencias Bioquímicas y Farmacéuticas, Universidad Nacional de Rosario, Suipacha 531, Rosario S2002LRK, Argentina.*

*<sup>b</sup> Instituto de Química Rosario (IQUIR, CONICET-UNR), 27 de febrero 210 bis, S2000EZP Rosario, Argentina.*

*<sup>c</sup> Instituto de Física Rosario (IFIR, CONICET-UNR), 27 de febrero 210 bis, Rosario S2000EZP, Argentina.*

---

\* Corresponding author: Tel.: +54-341-4370477, ext. 118; fax: +54-341-4370477, ext. 119.

E-mail address: [antonio@iquir-conicet.gov.ar](mailto:antonio@iquir-conicet.gov.ar) (M. Antonio) [maggio@iquir-conicet.gov.ar](mailto:maggio@iquir-conicet.gov.ar) (R.M. Maggio)

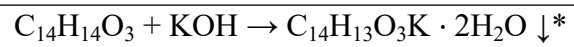

**Eq. S1**

\*Crystallized from a hydro-alcoholic (50:50) solution

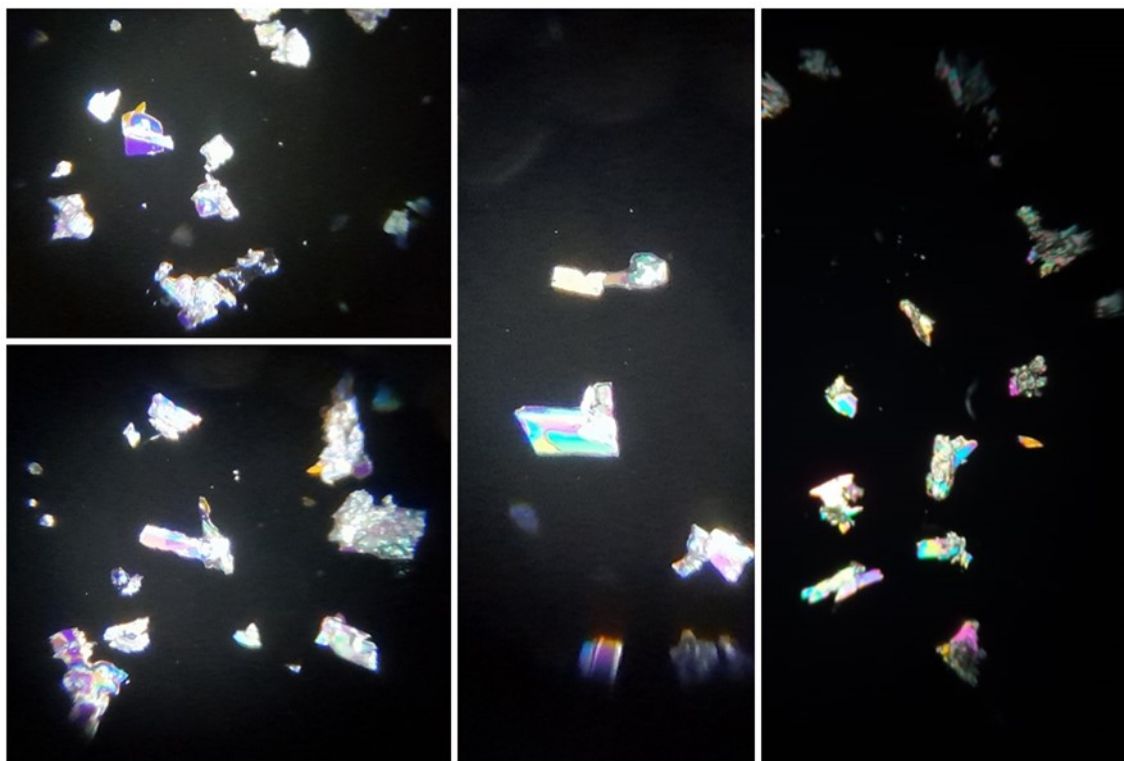

**Figure S1.** Different views of NP crystals exhibiting birefringence under polarized light microscopy at a total magnification of 55 $\times$ .

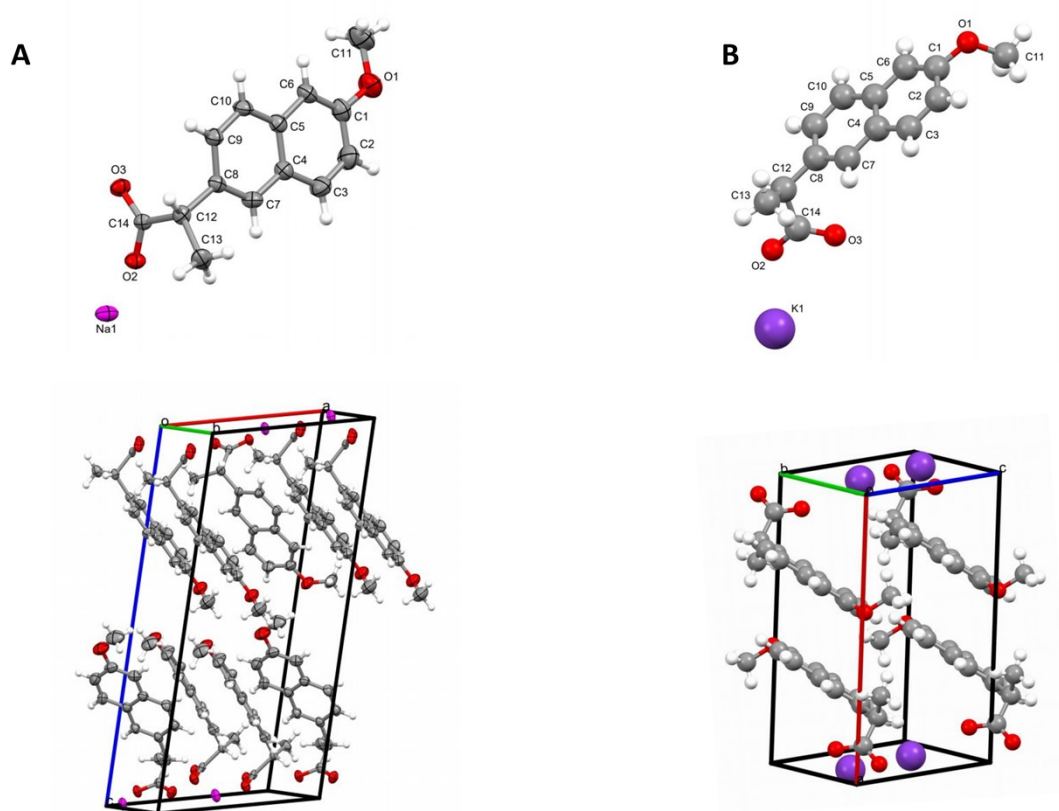

**Figure S2.** Asymmetric unit showing one naproxen anion, one counterion for NS (A) and of NP-ANH (B).

**Table S1.** Mass composition (mg) of the excipient matrix used for tablet formulation.

| Excipient                    | Amount (mg) |
|------------------------------|-------------|
| Corn starch                  | 77.8        |
| Povidone                     | 30.4        |
| Croscarmellose sodium        | 21.2        |
| Colloidal silicon dioxide    | 1.42        |
| Magnesium stearate           | 3.54        |
| Hydroxypropylmethylcellulose | 9.00        |
| Polyethylene glycol 6000     | 1.20        |
| Sodium saccharin             | 0.345       |
| Tween 80                     | 0.495       |
| Titanium dioxide             | 4.60        |

**Table S2.** Spatial details. Atomic coordinates and equivalent isotropic displacement parameters ( $\text{\AA}^2$ ) for NP-DH.

|     | <b>x/a</b>  | <b>y/b</b>  | <b>z/c</b>   | <b>U (eq)</b> |
|-----|-------------|-------------|--------------|---------------|
| K1  | 0.7077 (3)  | 0.3550 (3)  | 0.54259 (5)  | 0.0449 (5)    |
| O1  | 0.0483 (12) | 0.0817 (11) | 0.5268 (2)   | 0.059 (2)     |
| O2  | 0.0256 (10) | 0.6426 (11) | 0.52403 (16) | 0.0463 (15)   |
| O3  | 0.4408 (9)  | 0.6673 (8)  | 0.56051 (12) | 0.0371 (13)   |
| O4  | 0.5013 (9)  | 0.9873 (8)  | 0.54479 (13) | 0.0397 (13)   |
| O5  | 0.8075 (11) | 0.9411 (8)  | 0.72413 (14) | 0.0470 (15)   |
| C1  | 0.5052 (12) | 0.8436 (13) | 0.56647 (18) | 0.0305 (17)   |
| C2  | 0.5928 (12) | 0.8981 (11) | 0.60300 (19) | 0.0294 (18)   |
| C3  | 0.4022 (15) | 0.0279 (12) | 0.6197 (2)   | 0.043 (2)     |
| C4  | 0.6633 (12) | 0.7150 (11) | 0.62409 (18) | 0.0254 (17)   |
| C5  | 0.8683 (12) | 0.6122 (12) | 0.61472 (19) | 0.0331 (19)   |
| C6  | 0.9420 (13) | 0.4441 (12) | 0.63226 (18) | 0.0323 (19)   |
| C7  | 0.8183 (12) | 0.3646 (12) | 0.66004(17)  | 0.0302 (16)   |
| C8  | 0.6127 (11) | 0.4645 (11) | 0.67001 (18) | 0.0263 (17)   |
| C9  | 0.5403 (12) | 0.6382 (13) | 0.65109 (18) | 0.0325 (17)   |
| C10 | 0.4881 (13) | 0.3879 (12) | 0.69868 (19) | 0.0349 (18)   |
| C11 | 0.5605 (14) | 0.2150 (12) | 0.71565 (19) | 0.036 (2)     |
| C12 | 0.7610 (12) | 0.1114 (12) | 0.70551 (18) | 0.0320 (18)   |
| C13 | 0.8871 (13) | 0.1855 (11) | 0.67829 (18) | 0.0317 (18)   |
| C14 | 0.9995 (16) | 0.8209 (13) | 0.7132 (2)   | 0.049 (2)     |

U(eq) is defined as one third of the trace of the orthogonalized  $U_{ij}$  tensor

**Table S3.** Bond lengths [Å] and angles [°] for NP-DH.

| Bond lengths | Values (E) [Å] |
|--------------|----------------|
| K1-O3        | 2.662 (6)      |
| K1-O2        | 2.737 (7)      |
| K1-O1#2      | 2.866 (8)      |
| K1-C1        | 3.534 (8)      |
| K1-K1#3      | 4.605 (3)      |
| K1-H2A       | 2.99 (9)       |
| O1-H1A       | 0.77 (11)      |
| O2-H2A       | 0.90 (9)       |
| O4-C1        | 1.260 (9)      |
| O5-C14       | 1.432 (10)     |
| C2-C4        | 1.507 (10)     |
| C2-H2        | 0.98           |
| C3-H3B       | 0.96           |
| C4-C9        | 1.362 (10)     |
| C5-C6        | 1.362 (11)     |
| C6-C7        | 1.394 (10)     |
| C7-C8        | 1.418 (9)      |
| C8-C10       | 1.416 (10)     |
| C9-H9        | 0.93           |
| C10-H10      | 0.93           |
| C11-H11      | 0.93           |
| C13-H13      | 0.93           |
| C14-H14B     | 0.96           |
| K1-O4#1      | 2.693 (6)      |
| K1-O1        | 2.741 (7)      |
| K1-C5        | 3.389 (8)      |
| K1-K1#2      | 4.605 (3)      |
| K1-H1B       | 3.03 (11)      |

|          |            |
|----------|------------|
| O1-H1B   | 0.81 (11)  |
| O2-H2B   | 0.82 (10)  |
| O3-C1    | 1.236 (9)  |
| O5-C12   | 1.355 (9)  |
| C1-C2    | 1.543 (10) |
| C2-C3    | 1.541 (10) |
| C3-H3A   | 0.96       |
| C3-H3C   | 0.96       |
| C4-C5    | 1.418 (10) |
| C5-H5    | 0.93       |
| C6-H6    | 0.93       |
| C7-C13   | 1.426 (10) |
| C8-C9    | 1.417 (10) |
| C10-C11  | 1.375 (11) |
| C11-C12  | 1.406 (10) |
| C12-C13  | 1.372 (10) |
| C14-H14A | 0.96       |
| C14-H14C | 0.96       |

**Bond angle**

**Value[°] (E)**

|            |             |
|------------|-------------|
| O3-K1-O4#1 | 114.72 (18) |
| O4#1-K1-O2 | 157.80 (19) |
| O4#1-K1-O1 | 75.31 (19)  |
| O3-K1-O1#3 | 86.71 (18)  |
| O2-K1-O1#3 | 82.8 (2)    |
| O3-K1-C5   | 64.22 (17)  |
| O2-K1-C5   | 71.74 (19)  |
| O1#3-K1-C5 | 141.9 (2)   |
| O4#1-K1-C1 | 130.74 (17) |
| O1-K1-C1   | 153.0 (2)   |
| C5-K1-C1   | 55.04 (18)  |

|              |             |
|--------------|-------------|
| O4#1-K1-K1#3 | 58.20 (12)  |
| O1-K1-K1#3   | 95.93 (18)  |
| C5-K1-K1#3   | 155.63 (13) |
| O3-K1-K1#4   | 141.72 (14) |
| O2-K1-K1#4   | 65.82 (14)  |
| O1#3-K1-K1#4 | 65.16 (16)  |
| C1-K1-K1#4   | 131.93 (14) |
| O3-K1-H1B    | 175.23 (2)  |
| O2-K1-H1B    | 99.15 (2)   |
| O1#3-K1-H1B  | 95.12 (2)   |
| C1-K1-H1B    | 168.25 (2)  |
| K1#4-K1-H1B  | 43.36 (2)   |
| O4#1-K1-H2A  | 143.0 (18)  |
| O1-K1-H2A    | 77.3 (18)   |
| C5-K1-H2A    | 89.1 (18)   |
| K1#3-K1-H2A  | 101.0 (18)  |
| H1B-K1-H2A   | 90.1 (3)    |
| K1-O1-H1B    | 103.1 (8)   |
| K1-O1-H1A    | 123.3 (9)   |
| H1B-O1-H1A   | 128.2 (10)  |
| K1-O2-H2A    | 98.(6)      |
| C1-O3-K1     | 126.1 (5)   |
| C12-O5-C14   | 116.9 (6)   |
| O3-C1-C2     | 119.2 (6)   |
| O3-C1-K1     | 37.5 (4)    |
| C2-C1-K1     | 109.8 (4)   |
| C4-C2-C1     | 113.6 (6)   |
| C4-C2-H2     | 107.6       |
| C1-C2-H2     | 107.6       |
| C2-C3-H3B    | 109.5       |

|               |             |
|---------------|-------------|
| C2-C3-H3C     | 109.5       |
| H3B-C3-H3C    | 109.5       |
| C9-C4-C2      | 124.4 (7)   |
| C6-C5-C4      | 121.5 (7)   |
| C4-C5-K1      | 102.3 (4)   |
| C4-C5-H5      | 119.3       |
| C5-C6-C7      | 121.5 (7)   |
| C7-C6-H6      | 119.3       |
| C6-C7-C13     | 122.9 (7)   |
| C10-C8-C9     | 122.4 (7)   |
| C9-C8-C7      | 118.8 (7)   |
| C4-C9-H9      | 118.8       |
| C11-C10-C8    | 120.5 (7)   |
| C8-C10-H10    | 119.7       |
| C10-C11-H11   | 119.4       |
| O5-C12-C13    | 126.3 (7)   |
| C13-C12-C11   | 119.2 (7)   |
| C12-C13-H13   | 119.3       |
| O5-C14-H14A   | 109.5       |
| H14A-C14-H14B | 109.5       |
| H14A-C14-H14C | 109.5       |
| O3-K1-O2      | 86.23 (19)  |
| O3-K1-O1      | 169.4 (2)   |
| O2-K1-O1      | 84.3 (2)    |
| O4#1-K1-O1#3  | 90.82 (19)  |
| O1-K1-O1#3    | 96.92 (18)  |
| O4#1-K1-C5    | 122.81 (18) |
| O1-K1-C5      | 108.0 (2)   |
| O3-K1-C1      | 16.42 (16)  |
| O2-K1-C1      | 70.77 (19)  |

|              |             |
|--------------|-------------|
| O1#3-K1-C1   | 90.28 (19)  |
| O3-K1-K1#3   | 92.63 (11)  |
| O2-K1-K1#3   | 116.49 (16) |
| O1#3-K1-K1#3 | 33.92 (15)  |
| C1-K1-K1#3   | 104.24 (12) |
| O4#1-K1-K1#4 | 92.18 (13)  |
| O1-K1-K1#4   | 35.70 (17)  |
| C5-K1-K1#4   | 124.19 (13) |
| K1#3-K1-K1#4 | 78.46 (7)   |
| O4#1-K1-H1B  | 60.1 (2)    |
| O1-K1-H1B    | 15.9 (2)    |
| C5-K1-H1B    | 116.7 (2)   |
| K1#3-K1-H1B  | 86.5 (2)    |
| O3-K1-H2A    | 94.9 (18)   |
| O2-K1-H2A    | 17.4 (18)   |
| O1#3-K1-H2A  | 68.3 (18)   |
| C1-K1-H2A    | 81.4 (18)   |
| K1#4-K1-H2A  | 51.7 (18)   |
| K1-O1-K1#4   | 110.4 (3)   |
| K1#4-O1-H1B  | 103.3 (8)   |
| K1#4-O1-H1A  | 82.5 (9)    |
| K1-O2-H2B    | 110.1 (7)   |
| H2B-O2-H2A   | 108.0 (9)   |
| C1-O4-K1#2   | 132.9 (5)   |
| O3-C1-O4     | 124.6 (7)   |
| O4-C1-C2     | 116.2 (7)   |
| O4-C1-K1     | 120.6 (5)   |
| C4-C2-C3     | 114.1 (6)   |
| C3-C2-C1     | 105.9 (6)   |
| C3-C2-H2     | 107.6       |

|               |           |
|---------------|-----------|
| C2-C3-H3A     | 109.5     |
| H3A-C3-H3B    | 109.5     |
| H3A-C3-H3C    | 109.5     |
| C9-C4-C5      | 117.6 (7) |
| C5-C4-C2      | 118.0 (7) |
| C6-C5-K1      | 95.4 (5)  |
| C6-C5-H5      | 119.3     |
| K1-C5-H5      | 71.6      |
| C5-C6-H6      | 119.3     |
| C6-C7-C8      | 118.2 (7) |
| C8-C7-C13     | 118.9 (7) |
| C10-C8-C7     | 118.8 (7) |
| C4-C9-C8      | 122.4(7)  |
| C8-C9-H9      | 118.8     |
| C11-C10-H10   | 119.7     |
| C10-C11-C12   | 121.3(7)  |
| C12-C11-H11   | 119.4     |
| O5-C12-C11    | 114.6(7)  |
| C12-C13-C7    | 121.3(7)  |
| C7-C13-H13    | 119.3     |
| O5-C14-H14B   | 109.5     |
| O5-C14-H14C   | 109.5     |
| H14B-C14-H14C | 109.5     |

Symmetry transformations used to generate equivalent atoms:

#1 x, y-1, z

#2 x, y+1, z

#3 x-1/2, -y+1/2, -z+1

#4 x+1/2, -y+1/2, -z+1

### Crystal Structure Solution from PXRD Data

PXRD data were analyzed using the EXPO Version 2.3.10 software package [56]. The diffraction pattern was indexed using the N-TREOR09 algorithm based on the peaks detected in the 5°–25° 2 $\theta$  angular range. The triclinic P-1 space group provided the best agreement between the calculated and experimental diffraction data, after several systematic trials. The crystal structure was solved by a simulated annealing approach, involving the generation of random molecular configurations through rotational motions around the molecular center of mass combined with translational movements in all spatial directions. Finally, a full Rietveld refinement was performed to optimize the structural model. CCDC number 2554047 contains the supplementary crystallographic data for this study. These data can be obtained free of charge from the Cambridge Crystallographic Data Center (CCDC) via. [www.ccdc.cam.ac.uk/structures](http://www.ccdc.cam.ac.uk/structures)".

**Table S4.** Crystal data and structure refinement for NP-ANH

| Compound                                 | NP-ANH                                           |
|------------------------------------------|--------------------------------------------------|
| Empirical formula                        | C <sub>14</sub> H <sub>14</sub> K O <sub>3</sub> |
| Formula weight                           | 268.35                                           |
| Temperature (K)                          | 297 (2)                                          |
| Crystal system                           | Triclinic                                        |
| Space group                              | P-1                                              |
| <i>a</i> (Å)                             | 14.24(5)                                         |
| <i>b</i> (Å)                             | 10.34(4)                                         |
| <i>c</i> (Å)                             | 6.28(2)                                          |
| $\alpha$ (°)                             | 97.16(16)                                        |
| $\beta$ (°)                              | 94.52(19)                                        |
| $\gamma$ (°)                             | 72.74(19)                                        |
| Volume (Å <sup>3</sup> )                 | 875(5)                                           |
| <i>Z</i>                                 | 2                                                |
| Calculated density (g cm <sup>-3</sup> ) | 1.018                                            |
| Reflection collected                     | 311                                              |
| Refinement method                        | Rietveld                                         |
| Parameters refined                       | 21                                               |
| Goodness-on-fit of <i>F</i> <sup>2</sup> | 12.65561                                         |
| <i>R</i>                                 | 0.33173                                          |
| CCDC number                              | 2554047                                          |

**Table S5.** Spatial details. Atomic coordinates and equivalent isotropic displacement parameters ( $\text{\AA}^2$ ) for NP-DH.

|     | <b>x/a</b> | <b>y/b</b> | <b>z/c</b> | <b>U (eq)</b> |
|-----|------------|------------|------------|---------------|
| K1  | -0.0164    | 1.3109     | 1.1506     | 0.0127        |
| O1  | 0.4264     | 0.1544     | 1.1171     | 0.0380        |
| O2  | 0.0685     | 1.0910     | 0.8953     | 0.0380        |
| O3  | 0.1262     | 0.9385     | 1.1266     | 0.0380        |
| C1  | 0.3954     | 0.2853     | 1.0709     | 0.0380        |
| C2  | 0.4320     | 0.3758     | 1.2142     | 0.0380        |
| H1  | 0.4749     | 0.3428     | 1.3264     | 0.0456        |
| C3  | 0.4054     | 0.5121     | 1.1914     | 0.0380        |
| H2  | 0.4308     | 0.5699     | 1.2871     | 0.0456        |
| C4  | 0.3392     | 0.5655     | 1.0230     | 0.0380        |
| C5  | 0.3038     | 0.4748     | 0.8739     | 0.0380        |
| C6  | 0.3331     | 0.3341     | 0.9043     | 0.0380        |
| H3  | 0.3093     | 0.2740     | 0.8091     | 0.0456        |
| C7  | 0.3074     | 0.7059     | 0.9979     | 0.0380        |
| H4  | 0.3293     | 0.7655     | 1.0975     | 0.0456        |
| C8  | 0.2456     | 0.7569     | 0.8325     | 0.0380        |
| C9  | 0.2117     | 0.6637     | 0.6869     | 0.0380        |
| H5  | 0.1687     | 0.6960     | 0.5743     | 0.0456        |
| C10 | 0.2403     | 0.5283     | 0.7068     | 0.0380        |
| H6  | 0.2171     | 0.4701     | 0.6069     | 0.0456        |
| C11 | 0.3804     | 0.1195     | 1.2892     | 0.0380        |
| H7  | 0.3945     | 0.0226     | 1.2829     | 0.0456        |
| H8  | 0.3108     | 0.1588     | 1.2759     | 0.0456        |
| H9  | 0.4049     | 0.1534     | 1.4235     | 0.0456        |
| C12 | 0.2096     | 0.9056     | 0.7996     | 0.0380        |
| H10 | 0.1824     | 0.9128     | 0.6526     | 0.0456        |
| C13 | 0.2896     | 0.9799     | 0.8286     | 0.0380        |

|     |        |        |        |        |
|-----|--------|--------|--------|--------|
| H11 | 0.3075 | 0.9918 | 0.9782 | 0.0456 |
| H12 | 0.2652 | 1.0670 | 0.7748 | 0.0456 |
| H13 | 0.3460 | 0.9274 | 0.7517 | 0.0456 |
| C14 | 0.1279 | 0.9868 | 0.9521 | 0.0380 |

**Table S6.** Bond lengths [Å] and angles [°] for NP-ANH.

| <b>Bond lengths</b> | <b>Values (E) [Å]</b> |
|---------------------|-----------------------|
| K1-O2               | 2.640(10)             |
| K1-C9_a             | 2.965(11)             |
| O1-C1               | 1.354(5)              |
| O1-C11              | 1.441(6)              |
| O2-C14              | 1.229(5)              |
| O3-C14              | 1.264(5)              |
| C1-C2               | 1.401(5)              |
| C1-C6               | 1.362(5)              |
| C2-C3               | 1.369(5)              |
| C3-C4               | 1.411(5)              |
| C4-C5               | 1.413(5)              |
| C4-C7               | 1.412(5)              |
| C5-C6               | 1.423(6)              |
| C5-C10              | 1.387(5)              |
| C7-C8               | 1.360(5)              |
| C8-C9               | 1.409(5)              |
| C8-C12              | 1.505(6)              |
| C9-C10              | 1.356(5)              |
| C12-C13             | 1.540(6)              |
| C12-C14             | 1.540(6)              |
| C2-H1               | 0.9200                |
| C3-H2               | 0.9200                |
| C6-H3               | 0.9300                |
| C7-H4               | 0.9200                |
| C9-H5               | 0.9300                |
| C10-H6              | 0.9300                |
| C11-H7              | 0.9600                |
| C11-H8              | 0.9500                |

|                   |                     |
|-------------------|---------------------|
| C11-H9            | 0.9500              |
| C12-H10           | 0.9800              |
| C13-H11           | 0.9600              |
| C13-H12           | 0.9600              |
| C13-H13           | 0.9500              |
|                   |                     |
| <b>Bond angle</b> | <b>Value[°] (E)</b> |
| C2-C3-C4          | 120.61(16)          |
| C3-C4-C5          | 118.7(2)            |
| C3-C4-C7          | 122.41(16)          |
| C5-C4-C7          | 118.9(2)            |
| C4-C5-C6          | 118.8(2)            |
| C4-C5-C10         | 118.1(2)            |
| C6-C5-C10         | 123.16(15)          |
| C1-C6-C5          | 121.50(16)          |
| C4-C7-C8          | 122.39(16)          |
| C7-C8-C9          | 117.2(2)            |
| C7-C8-C12         | 124.24(15)          |
| C9-C8-C12         | 118.6(2)            |
| C8-C9-C10         | 122.0(2)            |
| K1_a-C9-C8        | 102.5(2)            |
| K1_a-C9-C10       | 90.2(2)             |
| C5-C10-C9         | 121.43(16)          |
| C8-C12-C13        | 114.8(2)            |
| C8-C12-C14        | 112.56(19)          |
| C13-C12-C14       | 106.3(2)            |
| O2-C14-O3         | 124.84(19)          |
| O2-C14-C12        | 118.5(2)            |
| C4-C7-H4          | 119.00              |
| C8-C7-H4          | 119.00              |

|             |        |
|-------------|--------|
| C8-C9-H5    | 119.00 |
| C10-C9-H5   | 119.00 |
| K1_a-C9-H5  | 77.00  |
| C5-C10-H6   | 119.00 |
| C9-C10-H6   | 119.00 |
| O1-C11-H7   | 110.00 |
| O1-C11-H8   | 110.00 |
| O1-C11-H9   | 109.00 |
| H7-C11-H8   | 109.00 |
| H7-C11-H9   | 109.00 |
| H8-C11-H9   | 110.00 |
| C8-C12-H10  | 108.00 |
| C13-C12-H10 | 107.00 |
| C14-C12-H10 | 108.00 |
| C12-C13-H11 | 109.00 |
| C12-C13-H12 | 110.00 |
| C12-C13-H13 | 110.00 |
| H11-C13-H12 | 110.00 |
| H11-C13-H13 | 110.00 |

## References

- 50 Bruker AXS Inc., APEX4, v2022.10-1, Madison, WI, USA, 2022.
- 51 Bruker AXS Inc., SAINT, V8.40B, Madison, WI, USA, 2019.
- 52 G. M. Sheldrick, *Acta Cryst. A*, 2015, **71**, 3–8.
- 53 G. G. M. Sheldrick, *Acta Cryst. C*, 2015, **71**, 3–8.
- 54 C. F. Macrae, I. Sovago, S. J. Cottrell, P. T. A. Galek, P. McCabe, E. Pidcock, M. Platings, G. P. Shields, J. S. Stevens, M. Towler, P. A. Wood, *J. Appl. Cryst.*, 2020, **53**, 226–235.
- 55 A. Altomare, C. Cuocci, C. Giacovazzo, A. Moliterni, R. Rizzi, N. Corriero and A. Falcicchio, (2013). *J. Appl. Cryst.*, **46**, 1231-1235.
